# Supplementary material
Source: PubMed Central journal article supplement (PMC5927624)
Supplement: NIHMS876963-supplement-Supp_info.pdf [file NIHMS876963-supplement-Supp_info.pdf]

**Developmental regulation and localization of Carnitine Palmitoyltransferases  
(CPTs) in rat brain**

Jennifer N. Jernberg<sup>1</sup>, Caitlyn E. Bowman<sup>2</sup>, Michael J. Wolfgang<sup>2</sup>, Susanna Scafidi<sup>1</sup>

| Acylcarnitines<br>(nmol/mL) | Ages (days)                         |                                      |                                       |                                  |                               |               |
|-----------------------------|-------------------------------------|--------------------------------------|---------------------------------------|----------------------------------|-------------------------------|---------------|
|                             | P0                                  | P7                                   | P14                                   | P21                              | P28                           | P50           |
| <b>Total</b>                | 22.65 ± 1.64 <sup>bbbb cc</sup>     | 31.06 ± 2.695 <sup>fff g</sup>       | 69.87 ± 3.923 <sup>kkkk llll</sup>    | 52.87 ± 9 <sup>m nn</sup>        | 28.81 ± 3.286                 | 22.06 ± 2.68  |
| <b>C0</b>                   | 12.13 ± 0.90 <sup>bbbb cccc</sup>   | 17.9 ± 1.505 <sup>fff gg</sup>       | 40.15 ± 2.216 <sup>kkkk llll</sup>    | 34.99 ± 4.49 <sup>mmm nnnn</sup> | 16.62 ± 2.336                 | 12.99 ± 1.32  |
| <b>C2</b>                   | 6.68 ± 0.69 <sup>bbb</sup>          | 7.864 ± 1.019 <sup>fff</sup>         | 23.91 ± 2.248 <sup>kkk lll</sup>      | 13.6 ± 4.041                     | 8.496 ± 0.977                 | 7.48 ± 1.05   |
| <b>C3</b>                   | 0.459 ± 0.06                        | 0.278 ± 0.036 <sup>g</sup>           | 0.621 ± 0.053                         | 0.693 ± 0.153                    | 0.39 ± 0.029                  | 0.325 ± 0.08  |
| <b>C3-DC</b>                | 0.064 ± 0.005                       | 0.071 ± 0.018                        | 0.096 ± 0.006 <sup>l</sup>            | 0.098 ± 0.008 <sup>n</sup>       | 0.061 ± 0.01                  | 0.045 ± 0.006 |
| <b>C4</b>                   | 0.395 ± 0.04                        | 0.408 ± 0.032                        | 0.753 ± 0.081                         | 0.786 ± 0.211                    | 0.655 ± 0.218                 | 0.303 ± 0.12  |
| <b>C4-OH</b>                | 0.145 ± 0.023 <sup>bb</sup>         | 0.146 ± 0.027 <sup>ff</sup>          | 0.389 ± 0.024 <sup>kkk lll</sup>      | 0.229 ± 0.072                    | 0.098 ± 0.014                 | 0.1 ± 0.032   |
| <b>C4-DC</b>                | 0.016 ± 0.002 <sup>bb</sup>         | 0.024 ± 0.002 <sup>f</sup>           | 0.043 ± 0.003 <sup>ll</sup>           | 0.03 ± 0.005                     | 0.025 ± 0.006                 | 0.018 ± 0.003 |
| <b>C5:1</b>                 | 0.015 ± 0.004                       | 0.014 ± 0.004                        | 0.029 ± 0.009 <sup>ll</sup>           | 0.013 ± 0.006                    | 0.006 ± 0.001                 | 0 ± 0         |
| <b>C5</b>                   | 0.07 ± 0.017 <sup>bbb</sup>         | 0.15 ± 0.016 <sup>f</sup>            | 0.278 ± 0.035 <sup>jj kkk ll</sup>    | 0.115 ± 0.044                    | 0.08 ± 0.01                   | 0.09 ± 0.019  |
| <b>C5-OH</b>                | 0.034 ± 0.005 <sup>b</sup>          | 0.048 ± 0.01                         | 0.076 ± 0.007 <sup>k ll</sup>         | 0.05 ± 0.009                     | 0.033 ± 0.003                 | 0.025 ± 0.009 |
| <b>C5-DC/C10-OH</b>         | 0.013 ± 0.001                       | 0.011 ± 0.003                        | 0.016 ± 0.002                         | 0.019 ± 0.006                    | 0.01 ± 0.002                  | 0.008 ± 0.003 |
| <b>C6</b>                   | 0.069 ± 0.009 <sup>bb</sup>         | 0.095 ± 0.009 <sup>ii</sup>          | 0.145 ± 0.013 <sup>jk llll</sup>      | 0.08 ± 0.018 <sup>n</sup>        | 0.079 ± 0.017 <sup>o</sup>    | 0.013 ± 0.003 |
| <b>C8:1</b>                 | 0.045 ± 0.004 <sup>e</sup>          | 0.065 ± 0.005 <sup>g h iii</sup>     | 0.066 ± 0.004                         | 0.034 ± 0.01                     | 0.031 ± 0.008                 | 0.015 ± 0.003 |
| <b>C8</b>                   | 0.061 ± 0.012                       | 0.079 ± 0.012 <sup>i</sup>           | 0.101 ± 0.021 <sup>ll</sup>           | 0.053 ± 0.013                    | 0.048 ± 0.006                 | 0.018 ± 0.005 |
| <b>C10:1</b>                | 0.055 ± 0.004                       | 0.056 ± 0.007                        | 0.055 ± 0.005                         | 0.059 ± 0.013 <sup>n</sup>       | 0.066 ± 0.011 <sup>oo</sup>   | 0.018 ± 0.003 |
| <b>C10</b>                  | 0.034 ± 0.007 <sup>aaa bbb</sup>    | 0.158 ± 0.023 <sup>g hhh iii</sup>   | 0.165 ± 0.014 <sup>jk kkk llll</sup>  | 0.083 ± 0.023 <sup>n</sup>       | 0.041 ± 0.005                 | 0.005 ± 0.003 |
| <b>C12:1</b>                | 0.011 ± 0.002                       | 0.014 ± 0.001                        | 0.013 ± 0.001                         | 0.011 ± 0.001                    | 0.015 ± 0.003                 | 0.005 ± 0.003 |
| <b>C12</b>                  | 0.038 ± 0.006 <sup>aaa bbb</sup>    | 0.206 ± 0.02 <sup>ggg hhh iii</sup>  | 0.195 ± 0.023 <sup>jjj kkk llll</sup> | 0.066 ± 0.015                    | 0.053 ± 0.005                 | 0.013 ± 0.003 |
| <b>C12:1-OH</b>             | 0.019 ± 0.002                       | 0.014 ± 0.004                        | 0.011 ± 0.001                         | 0.015 ± 0.003                    | 0.015 ± 0.007                 | 0.003 ± 0.003 |
| <b>C12-OH</b>               | 0.008 ± 0.001                       | 0.013 ± 0.001 <sup>ii</sup>          | 0.011 ± 0.002 <sup>l</sup>            | 0.011 ± 0.001 <sup>n</sup>       | 0.01 ± 0                      | 0.003 ± 0.003 |
| <b>C14:2</b>                | 0.018 ± 0.001                       | 0.013 ± 0.003                        | 0.025 ± 0.006                         | 0.029 ± 0.002 <sup>n</sup>       | 0.019 ± 0.006                 | 0.008 ± 0.003 |
| <b>C14:1</b>                | 0.051 ± 0.009 <sup>eee</sup>        | 0.048 ± 0.003 <sup>ii</sup>          | 0.035 ± 0.005                         | 0.036 ± 0.006                    | 0.048 ± 0.005 <sup>oo</sup>   | 0.013 ± 0.003 |
| <b>C14</b>                  | 0.11 ± 0.005 <sup>aaa bbb</sup>     | 0.354 ± 0.026 <sup>ggg hhh iii</sup> | 0.401 ± 0.043 <sup>jjj kkk llll</sup> | 0.119 ± 0.027                    | 0.091 ± 0.005                 | 0.03 ± 0.006  |
| <b>C14:1-OH</b>             | 0.02 ± 0.002                        | 0.034 ± 0.009 <sup>f ii</sup>        | 0.011 ± 0.002                         | 0.019 ± 0.002                    | 0.019 ± 0.003                 | 0.005 ± 0.003 |
| <b>C14-OH</b>               | 0.019 ± 0.002                       | 0.024 ± 0.006                        | 0.025 ± 0.004                         | 0.024 ± 0.002                    | 0.011 ± 0.001                 | 0.01 ± 0      |
| <b>C16:1</b>                | 0.069 ± 0.007 <sup>b eee</sup>      | 0.074 ± 0.004 <sup>ff g h iii</sup>  | 0.035 ± 0.002                         | 0.045 ± 0.01                     | 0.043 ± 0.005                 | 0.02 ± 0.004  |
| <b>C16</b>                  | 0.778 ± 0.053 <sup>aaa bb e</sup>   | 1.559 ± 0.108 <sup>ggg hh iii</sup>  | 1.436 ± 0.19 <sup>jj kk llll</sup>    | 0.676 ± 0.128                    | 0.814 ± 0.034 <sup>oo</sup>   | 0.183 ± 0.028 |
| <b>C16:1-OH</b>             | 0.031 ± 0.004 <sup>e</sup>          | 0.03 ± 0.004 <sup>l</sup>            | 0.024 ± 0.002 <sup>k</sup>            | 0.036 ± 0.006 <sup>nn</sup>      | 0.044 ± 0.004 <sup>ooo</sup>  | 0.01 ± 0      |
| <b>C16-OH</b>               | 0.024 ± 0.006                       | 0.018 ± 0.003                        | 0.028 ± 0.006                         | 0.016 ± 0.006                    | 0.009 ± 0.001                 | 0.01 ± 0      |
| <b>C18:2</b>                | 0.156 ± 0.01 <sup>aa cc dd ee</sup> | 0.031 ± 0.005 <sup>bb</sup>          | 0.024 ± 0.006 <sup>l</sup>            | 0.029 ± 0.004 <sup>n</sup>       | 0.056 ± 0.005                 | 0.068 ± 0.013 |
| <b>C18:1</b>                | 0.523 ± 0.054 <sup>eee</sup>        | 0.769 ± 0.052 <sup>fff g h iii</sup> | 0.344 ± 0.029                         | 0.48 ± 0.097 <sup>nn</sup>       | 0.424 ± 0.032 <sup>oo</sup>   | 0.103 ± 0.014 |
| <b>C18</b>                  | 0.438 ± 0.023 <sup>c eeee</sup>     | 0.425 ± 0.02 <sup>iii</sup>          | 0.305 ± 0.016 <sup>ll</sup>           | 0.291 ± 0.051 <sup>nn</sup>      | 0.371 ± 0.031 <sup>oooo</sup> | 0.103 ± 0.013 |
| <b>C18:2-OH</b>             | 0.02 ± 0.005 <sup>e</sup>           | 0.021 ± 0.001 <sup>ii</sup>          | 0.015 ± 0.004                         | 0.011 ± 0.002                    | 0.014 ± 0.003                 | 0.003 ± 0.003 |
| <b>C18:1-OH</b>             | 0.024 ± 0.004                       | 0.026 ± 0.004                        | 0.02 ± 0.003                          | 0.02 ± 0.002                     | 0.014 ± 0.001                 | 0.013 ± 0.003 |
| <b>C18-OH</b>               | 0.018 ± 0.001                       | 0.023 ± 0.006                        | 0.021 ± 0.002                         | 0.013 ± 0.003                    | 0.011 ± 0.002                 | 0.013 ± 0.003 |

Supplemental Table 1. Blood acylcarnitines levels measured at post-natal day 0, 7, 14, 21, 28 and 50 (N=5/group).

| Acylcarnitines<br>( $\mu\text{mol}/\text{mg}$ ) | Cortex                                         |                                                 |                                          |                                      |                                  |                   |
|-------------------------------------------------|------------------------------------------------|-------------------------------------------------|------------------------------------------|--------------------------------------|----------------------------------|-------------------|
|                                                 | P0                                             | P7                                              | P14                                      | P21                                  | P28                              | P50               |
| <b>Total</b>                                    | 46.32 $\pm$ 2.224 <sup>bbbbb ccccc dd</sup>    | 61.19 $\pm$ 0.92 <sup>ff ggg</sup>              | 87.94 $\pm$ 5.375 <sup>lll</sup>         | 101.1 $\pm$ 6.769 <sup>mm nnnn</sup> | 75.64 $\pm$ 6.245                | 51.43 $\pm$ 1.887 |
| <b>C0</b>                                       | 23.74 $\pm$ 2.43 <sup>bbb cccc dd</sup>        | 35.76 $\pm$ 0.258 <sup>f gg</sup>               | 57.53 $\pm$ 5.864 <sup>ll</sup>          | 64.47 $\pm$ 5.037 <sup>nnn</sup>     | 49.41 $\pm$ 6.718 <sup>o</sup>   | 28.09 $\pm$ 0.555 |
| <b>C2</b>                                       | 17.52 $\pm$ 0.858 <sup>d eee</sup>             | 14.95 $\pm$ 0.415                               | 15.09 $\pm$ 0.311                        | 18.23 $\pm$ 1.039 <sup>mm nnn</sup>  | 13.52 $\pm$ 0.397                | 12.25 $\pm$ 0.83  |
| <b>C3</b>                                       | 0.408 $\pm$ 0.028 <sup>bb ccc</sup>            | 0.538 $\pm$ 0.079 <sup>gg</sup>                 | 0.729 $\pm$ 0.072 <sup>k lll</sup>       | 0.851 $\pm$ 0.04 <sup>mmm nnn</sup>  | 0.473 $\pm$ 0.035                | 0.343 $\pm$ 0.025 |
| <b>C3-DC</b>                                    | 0.089 $\pm$ 0.004 <sup>b cc dd</sup>           | 0.101 $\pm$ 0.009 <sup>gg hh</sup>              | 0.159 $\pm$ 0.021 <sup>ll</sup>          | 0.181 $\pm$ 0.014 <sup>nnn</sup>     | 0.17 $\pm$ 0.015 <sup>ooo</sup>  | 0.071 $\pm$ 0.005 |
| <b>C4</b>                                       | 1.272 $\pm$ 0.293 <sup>c</sup>                 | 2.844 $\pm$ 0.458                               | 3.047 $\pm$ 0.416 <sup>l</sup>           | 3.646 $\pm$ 0.859 <sup>m nn</sup>    | 1.25 $\pm$ 0.075                 | 0.867 $\pm$ 0.114 |
| <b>C4-OH</b>                                    | 0.271 $\pm$ 0.063                              | 0.276 $\pm$ 0.029                               | 0.417 $\pm$ 0.06 <sup>k</sup>            | 0.35 $\pm$ 0.061                     | 0.188 $\pm$ 0.004                | 0.237 $\pm$ 0.028 |
| <b>C4-DC</b>                                    | 0.048 $\pm$ 0.003 <sup>ccc d</sup>             | 0.052 $\pm$ 0.005 <sup>gg</sup>                 | 0.072 $\pm$ 0.01                         | 0.105 $\pm$ 0.012 <sup>nnn</sup>     | 0.086 $\pm$ 0.006 <sup>oo</sup>  | 0.042 $\pm$ 0.005 |
| <b>C5:1</b>                                     | 0.008 $\pm$ 0.003 <sup>bbbbb ccccc</sup>       | 0.01 $\pm$ 0.002 <sup>fff ggg</sup>             | 0.026 $\pm$ 0.002 <sup>kk ll</sup>       | 0.03 $\pm$ 0.003 <sup>mmm nn</sup>   | 0.012 $\pm$ 0.001                | 0.013 $\pm$ 0.002 |
| <b>C5</b>                                       | 0.354 $\pm$ 0.08 <sup>bb ccc</sup>             | 0.813 $\pm$ 0.192                               | 1.295 $\pm$ 0.114 <sup>ll</sup>          | 1.423 $\pm$ 0.259 <sup>m nnn</sup>   | 0.693 $\pm$ 0.06                 | 0.32 $\pm$ 0.042  |
| <b>C5-OH</b>                                    | 0.106 $\pm$ 0.02 <sup>bb cccc dddd</sup>       | 0.123 $\pm$ 0.013 <sup>ff gggg hhhh</sup>       | 0.375 $\pm$ 0.007 <sup>jjj</sup>         | 0.78 $\pm$ 0.097 <sup>m nnnn</sup>   | 0.541 $\pm$ 0.027 <sup>ooo</sup> | 0.214 $\pm$ 0.02  |
| <b>C5-DC/C10-OH</b>                             | 0.02 $\pm$ 0.005 <sup>cc</sup>                 | 0.055 $\pm$ 0.007 <sup>gg</sup>                 | 0.101 $\pm$ 0.011                        | 0.198 $\pm$ 0.059                    | 0.141 $\pm$ 0.03                 | 0.073 $\pm$ 0.009 |
| <b>C6</b>                                       | 0.105 $\pm$ 0.011 <sup>a bbbb</sup>            | 0.302 $\pm$ 0.02 <sup>f hh ii</sup>             | 0.49 $\pm$ 0.064 <sup>jjj kkk lll</sup>  | 0.225 $\pm$ 0.052 <sup>n</sup>       | 0.089 $\pm$ 0.007                | 0.05 $\pm$ 0.002  |
| <b>C8:1</b>                                     | 0.024 $\pm$ 0.002 <sup>aa bbb</sup>            | 0.062 $\pm$ 0.006 <sup>gggg hhh iii</sup>       | 0.067 $\pm$ 0.01 <sup>jjj kkk lll</sup>  | 0.015 $\pm$ 0.003                    | 0.016 $\pm$ 0.004                | 0.007 $\pm$ 0.002 |
| <b>C8</b>                                       | 0.053 $\pm$ 0.003 <sup>aaa bbb</sup>           | 0.249 $\pm$ 0.046 <sup>gg hhh iii</sup>         | 0.232 $\pm$ 0.035 <sup>jj kkk lll</sup>  | 0.078 $\pm$ 0.011                    | 0.045 $\pm$ 0.004                | 0.036 $\pm$ 0.002 |
| <b>C10:1</b>                                    | 0.076 $\pm$ 0.006 <sup>a cc dd ee</sup>        | 0.119 $\pm$ 0.01 <sup>gggg hhhh iii</sup>       | 0.093 $\pm$ 0.016 <sup>jjj kkk lll</sup> | 0.028 $\pm$ 0.001                    | 0.024 $\pm$ 0.002                | 0.017 $\pm$ 0.002 |
| <b>C10</b>                                      | 0.024 $\pm$ 0.003 <sup>aa bbbb</sup>           | 0.151 $\pm$ 0.01 <sup>h i</sup>                 | 0.231 $\pm$ 0.043 <sup>jj kkk lll</sup>  | 0.077 $\pm$ 0.014                    | 0.047 $\pm$ 0.006                | 0.043 $\pm$ 0.008 |
| <b>C12:1</b>                                    | 0.029 $\pm$ 0.004                              | 0.062 $\pm$ 0.008                               | 0.073 $\pm$ 0.007                        | 0.077 $\pm$ 0.027                    | 0.046 $\pm$ 0.012                | 0.063 $\pm$ 0.011 |
| <b>C12</b>                                      | 0.05 $\pm$ 0.008 <sup>bbbbb ccc</sup>          | 0.454 $\pm$ 0.063 <sup>ff</sup>                 | 1.241 $\pm$ 0.031 <sup>k ll</sup>        | 1.011 $\pm$ 0.285                    | 0.576 $\pm$ 0.085                | 0.461 $\pm$ 0.053 |
| <b>C12:1-OH</b>                                 | 0.007 $\pm$ 0.002 <sup>cc e</sup>              | 0.017 $\pm$ 0.002                               | 0.024 $\pm$ 0.003                        | 0.031 $\pm$ 0.006                    | 0.022 $\pm$ 0.004                | 0.025 $\pm$ 0.003 |
| <b>C12-OH</b>                                   | 0.017 $\pm$ 0.005 <sup>bb</sup>                | 0.032 $\pm$ 0.003                               | 0.055 $\pm$ 0.005 <sup>l</sup>           | 0.029 $\pm$ 0.012                    | 0.028 $\pm$ 0.002                | 0.022 $\pm$ 0.003 |
| <b>C14:2</b>                                    | 0.013 $\pm$ 0.003 <sup>bbbbb cc</sup>          | 0.033 $\pm$ 0.003 <sup>ff</sup>                 | 0.081 $\pm$ 0.006 <sup>kk</sup>          | 0.062 $\pm$ 0.017                    | 0.031 $\pm$ 0.002                | 0.045 $\pm$ 0.007 |
| <b>C14:1</b>                                    | 0.058 $\pm$ 0.009 <sup>cc</sup>                | 0.131 $\pm$ 0.017 <sup>gg</sup>                 | 0.399 $\pm$ 0.03                         | 0.717 $\pm$ 0.194                    | 0.526 $\pm$ 0.128                | 0.526 $\pm$ 0.071 |
| <b>C14</b>                                      | 0.2 $\pm$ 0.03 <sup>bbbbb cccc ddd e</sup>     | 0.672 $\pm$ 0.08 <sup>ff g</sup>                | 1.525 $\pm$ 0.033                        | 1.415 $\pm$ 0.164                    | 1.21 $\pm$ 0.219                 | 0.915 $\pm$ 0.169 |
| <b>C14:1-OH</b>                                 | 0.01 $\pm$ 0.002 <sup>d</sup>                  | 0.022 $\pm$ 0.001                               | 0.03 $\pm$ 0.006                         | 0.029 $\pm$ 0.007                    | 0.036 $\pm$ 0.008                | 0.032 $\pm$ 0.004 |
| <b>C14-OH</b>                                   | 0.39 $\pm$ 0.03 <sup>aaaa cccc dddd eeee</sup> | 0.642 $\pm$ 0.033 <sup>ffff gggg hhhh iii</sup> | 0.318 $\pm$ 0.015 <sup>jjj kkk lll</sup> | 0.07 $\pm$ 0.023                     | 0.047 $\pm$ 0.01                 | 0.045 $\pm$ 0.007 |
| <b>C16:1</b>                                    | 0.13 $\pm$ 0.013 <sup>cccc ddd eeee</sup>      | 0.328 $\pm$ 0.043 <sup>ggg hh iii</sup>         | 0.759 $\pm$ 0.1 <sup>j l</sup>           | 1.709 $\pm$ 0.158                    | 1.515 $\pm$ 0.261                | 1.693 $\pm$ 0.25  |
| <b>C16</b>                                      | 0.355 $\pm$ 0.031 <sup>cc dd ee</sup>          | 0.647 $\pm$ 0.07 <sup>g h i</sup>               | 0.86 $\pm$ 0.072                         | 1.71 $\pm$ 0.095                     | 1.678 $\pm$ 0.235                | 1.807 $\pm$ 0.437 |
| <b>C16:1-OH</b>                                 | 0.018 $\pm$ 0.003 <sup>ccc ddd ee</sup>        | 0.03 $\pm$ 0.005 <sup>gg hh i</sup>             | 0.05 $\pm$ 0.003                         | 0.077 $\pm$ 0.006                    | 0.082 $\pm$ 0.015                | 0.072 $\pm$ 0.009 |
| <b>C16-OH</b>                                   | 0.272 $\pm$ 0.037 <sup>aaaa e</sup>            | 0.602 $\pm$ 0.044 <sup>f gggg hhhh iii</sup>    | 0.409 $\pm$ 0.047 <sup>jjj kkk lll</sup> | 0.142 $\pm$ 0.027                    | 0.116 $\pm$ 0.013                | 0.098 $\pm$ 0.027 |
| <b>C18:2</b>                                    | 0.133 $\pm$ 0.011 <sup>bbbbb ccc dd</sup>      | 0.447 $\pm$ 0.065 <sup>fff</sup>                | 0.998 $\pm$ 0.07 <sup>kk lll</sup>       | 0.749 $\pm$ 0.12                     | 0.556 $\pm$ 0.06                 | 0.438 $\pm$ 0.054 |
| <b>C18:1</b>                                    | 0.337 $\pm$ 0.035 <sup>ccc ddd eee</sup>       | 0.411 $\pm$ 0.048 <sup>ggg hh iii</sup>         | 0.773 $\pm$ 0.051 <sup>jj k ll</sup>     | 1.96 $\pm$ 0.181                     | 1.901 $\pm$ 0.198                | 2.099 $\pm$ 0.416 |
| <b>C18</b>                                      | 0.155 $\pm$ 0.015 <sup>cccc dd</sup>           | 0.166 $\pm$ 0.021 <sup>gggg h</sup>             | 0.225 $\pm$ 0.018 <sup>jj k</sup>        | 0.481 $\pm$ 0.05 <sup>n</sup>        | 0.387 $\pm$ 0.022                | 0.299 $\pm$ 0.052 |
| <b>C18:2-OH</b>                                 | 0.011 $\pm$ 0.001 <sup>bb</sup>                | 0.032 $\pm$ 0.003                               | 0.072 $\pm$ 0.015                        | 0.043 $\pm$ 0.004                    | 0.051 $\pm$ 0.013                | 0.042 $\pm$ 0.005 |
| <b>C18:1-OH</b>                                 | 0.016 $\pm$ 0.002 <sup>cc ddd</sup>            | 0.024 $\pm$ 0.004 <sup>g hh</sup>               | 0.05 $\pm$ 0.005                         | 0.081 $\pm$ 0.018                    | 0.097 $\pm$ 0.015                | 0.052 $\pm$ 0.005 |
| <b>C18-OH</b>                                   | 0.017 $\pm$ 0.003 <sup>bb cc</sup>             | 0.029 $\pm$ 0.004                               | 0.045 $\pm$ 0.007                        | 0.045 $\pm$ 0.007                    | 0.036 $\pm$ 0.004                | 0.031 $\pm$ 0.003 |

Supplemental Table 2. Developmental acylcarnitine profile in the rat cortex at post-natal day (PND) 0, 7, 14, 21, 28, 50 ((N=5/group)).

| Acylcarnitines      | Hippocampus                               |                                         |                                    |                                   |                             |               |
|---------------------|-------------------------------------------|-----------------------------------------|------------------------------------|-----------------------------------|-----------------------------|---------------|
|                     | P0                                        | P7                                      | P14                                | P21                               | P28                         | P50           |
| <b>Total</b>        | 112.4 ± 21.93 <sup>c</sup>                | 121.1 ± 10.32 <sup>g</sup>              | 140 ± 17.61 <sup>l</sup>           | 191.7 ± 17.44 <sup>mmm nnn</sup>  | 99.04 ± 3.557               | 69.25 ± 2.208 |
| <b>C0</b>           | 36.81 ± 10.02 <sup>b cccc</sup>           | 65.98 ± 7.758 <sup>gg</sup>             | 89.9 ± 13.22 <sup>ll</sup>         | 128.9 ± 13.41 <sup>mmm nnnn</sup> | 59.69 ± 3.38                | 34.42 ± 1.708 |
| <b>C2</b>           | 64.89 ± 10.61 <sup>b ddd eee</sup>        | 43.48 ± 3.843                           | 37.19 ± 4.809                      | 44.17 ± 3.79                      | 26.43 ± 0.714               | 24.57 ± 0.342 |
| <b>C3</b>           | 0.639 ± 0.118 <sup>cc</sup>               | 0.722 ± 0.051 <sup>g</sup>              | 0.896 ± 0.085                      | 1.17 ± 0.09 <sup>mmm nnn</sup>    | 0.59 ± 0.048                | 0.549 ± 0.048 |
| <b>C3-DC</b>        | 0.129 ± 0.025 <sup>c</sup>                | 0.213 ± 0.025                           | 0.26 ± 0.034                       | 0.281 ± 0.036 <sup>n</sup>        | 0.194 ± 0.026               | 0.126 ± 0.02  |
| <b>C4</b>           | 2.846 ± 0.551                             | 2.387 ± 0.323                           | 1.968 ± 0.166                      | 1.878 ± 0.428                     | 1.468 ± 0.123               | 1.542 ± 0.145 |
| <b>C4-OH</b>        | 0.438 ± 0.105                             | 0.394 ± 0.05                            | 0.542 ± 0.057                      | 0.434 ± 0.104                     | 0.214 ± 0.028               | 0.239 ± 0.013 |
| <b>C4-DC</b>        | 0.183 ± 0.038 <sup>e</sup>                | 0.096 ± 0.013                           | 0.129 ± 0.026                      | 0.185 ± 0.012 <sup>n</sup>        | 0.102 ± 0.015               | 0.07 ± 0.004  |
| <b>C5:1</b>         | 0.027 ± 0.01                              | 0.017 ± 0.002                           | 0.019 ± 0.001                      | 0.024 ± 0.005                     | 0.015 ± 0.003               | 0.018 ± 0.002 |
| <b>C5</b>           | 0.609 ± 0.065 <sup>eeee</sup>             | 0.958 ± 0.114 <sup>gg</sup>             | 1.091 ± 0.131 <sup>l</sup>         | 1.658 ± 0.173 <sup>mmm nnnn</sup> | 0.778 ± 0.102               | 0.445 ± 0.049 |
| <b>C5-OH</b>        | 0.183 ± 0.039 <sup>b cccc dddd</sup>      | 0.166 ± 0.01 <sup>ff gggg hhhh</sup>    | 0.385 ± 0.008 <sup>jjj</sup>       | 0.93 ± 0.055 <sup>mmmm nnnn</sup> | 0.526 ± 0.046 <sup>oo</sup> | 0.28 ± 0.029  |
| <b>C5-DC/C10-OH</b> | 0.047 ± 0.017 <sup>cc</sup>               | 0.051 ± 0.005 <sup>gg</sup>             | 0.096 ± 0.009                      | 0.135 ± 0.019 <sup>nn</sup>       | 0.082 ± 0.014               | 0.044 ± 0.006 |
| <b>C6</b>           | 0.182 ± 0.056 <sup>aa b</sup>             | 0.426 ± 0.059 <sup>hhh iii</sup>        | 0.395 ± 0.03 <sup>kk lll</sup>     | 0.252 ± 0.042                     | 0.126 ± 0.012               | 0.087 ± 0.007 |
| <b>C8:1</b>         | 0.069 ± 0.01 <sup>dd eee</sup>            | 0.087 ± 0.004 <sup>gg hhhh iii</sup>    | 0.089 ± 0.01 <sup>jj kkk lll</sup> | 0.039 ± 0.009                     | 0.024 ± 0.004               | 0.013 ± 0     |
| <b>C8</b>           | 0.082 ± 0.026 <sup>aaaa bb</sup>          | 0.296 ± 0.042 <sup>gg hhhh iii</sup>    | 0.231 ± 0.009 <sup>kk lll</sup>    | 0.137 ± 0.019                     | 0.049 ± 0.007               | 0.039 ± 0.006 |
| <b>C10:1</b>        | 0.205 ± 0.03 <sup>bb ccc ddd eee</sup>    | 0.16 ± 0.018 <sup>gg hhh iii</sup>      | 0.112 ± 0.014 <sup>k l</sup>       | 0.054 ± 0.005                     | 0.023 ± 0.005               | 0.023 ± 0.002 |
| <b>C10</b>          | 0.034 ± 0.005 <sup>aa bbb c</sup>         | 0.155 ± 0.04 <sup>h l</sup>             | 0.185 ± 0.018 <sup>kk ll</sup>     | 0.149 ± 0.015 <sup>n</sup>        | 0.056 ± 0.011               | 0.054 ± 0.006 |
| <b>C12:1</b>        | 0.081 ± 0.022                             | 0.075 ± 0.013                           | 0.063 ± 0.008                      | 0.047 ± 0.007                     | 0.032 ± 0.002               | 0.041 ± 0.008 |
| <b>C12</b>          | 0.128 ± 0.042 <sup>a bbbb cc d</sup>      | 0.427 ± 0.095 <sup>f</sup>              | 0.747 ± 0.079 <sup>k lll</sup>     | 0.58 ± 0.063 <sup>n</sup>         | 0.435 ± 0.034               | 0.278 ± 0.033 |
| <b>C12:1-OH</b>     | 0.012 ± 0.012                             | 0.017 ± 0.002                           | 0.025 ± 0.003                      | 0.025 ± 0.003                     | 0.015 ± 0.002               | 0.017 ± 0.004 |
| <b>C12-OH</b>       | 0.012 ± 0.012 <sup>bb</sup>               | 0.034 ± 0.003                           | 0.053 ± 0.006 <sup>j k ll</sup>    | 0.021 ± 0.004                     | 0.019 ± 0.002               | 0.01 ± 0.002  |
| <b>C14:2</b>        | 0.034 ± 0.005                             | 0.034 ± 0.003                           | 0.054 ± 0.006                      | 0.04 ± 0.005                      | 0.03 ± 0.006                | 0.032 ± 0.005 |
| <b>C14:1</b>        | 0.15 ± 0.082 <sup>cc d</sup>              | 0.125 ± 0.02 <sup>gg h</sup>            | 0.229 ± 0.05                       | 0.532 ± 0.058                     | 0.471 ± 0.084               | 0.384 ± 0.074 |
| <b>C14</b>          | 0.36 ± 0.148 <sup>bb cccc dd</sup>        | 0.678 ± 0.121 <sup>gg h</sup>           | 1.243 ± 0.052                      | 1.622 ± 0.138 <sup>n</sup>        | 1.387 ± 0.184               | 0.893 ± 0.165 |
| <b>C14:1-OH</b>     | 0.025 ± 0.015                             | 0.013 ± 0.003                           | 0.013 ± 0.002                      | 0.012 ± 0.002                     | 0.027 ± 0.001               | 0.035 ± 0.007 |
| <b>C14-OH</b>       | 1.15 ± 0.19 <sup>a bbbb ccc ddd eee</sup> | 0.696 ± 0.046                           | 0.379 ± 0.031                      | 0.091 ± 0.015                     | 0.058 ± 0.009               | 0.04 ± 0.008  |
| <b>C16:1</b>        | 0.21 ± 0.046 <sup>ccc dd</sup>            | 0.278 ± 0.04 <sup>gg h</sup>            | 0.337 ± 0.027 <sup>jj k</sup>      | 1.169 ± 0.246                     | 0.937 ± 0.129               | 0.703 ± 0.095 |
| <b>C16</b>          | 0.842 ± 0.272 <sup>cc</sup>               | 0.962 ± 0.088 <sup>gg</sup>             | 1.16 ± 0.065 <sup>j</sup>          | 2.357 ± 0.376                     | 1.856 ± 0.216               | 1.671 ± 0.253 |
| <b>C16:1-OH</b>     | 0.059 ± 0.03                              | 0.038 ± 0.004                           | 0.041 ± 0.006                      | 0.081 ± 0.012                     | 0.061 ± 0.01                | 0.052 ± 0.004 |
| <b>C16-OH</b>       | 0.615 ± 0.05 <sup>bbb ccc ddd eee</sup>   | 0.534 ± 0.04 <sup>fff ggg hhh iii</sup> | 0.254 ± 0.017 <sup>j kkk lll</sup> | 0.111 ± 0.017                     | 0.054 ± 0.005               | 0.038 ± 0.006 |
| <b>C18:2</b>        | 0.249 ± 0.065 <sup>b cc</sup>             | 0.422 ± 0.049                           | 0.559 ± 0.044 <sup>l</sup>         | 0.609 ± 0.077 <sup>n</sup>        | 0.369 ± 0.05                | 0.239 ± 0.051 |
| <b>C18:1</b>        | 0.588 ± 0.151 <sup>ccc dd</sup>           | 0.593 ± 0.073 <sup>ggg hh</sup>         | 0.738 ± 0.078 <sup>jj k</sup>      | 2.506 ± 0.406                     | 1.94 ± 0.222                | 1.511 ± 0.21  |
| <b>C18</b>          | 0.381 ± 0.071 <sup>cccc d</sup>           | 0.453 ± 0.036 <sup>ggg</sup>            | 0.448 ± 0.046 <sup>jjj</sup>       | 1.328 ± 0.203 <sup>nn</sup>       | 0.881 ± 0.079               | 0.726 ± 0.083 |
| <b>C18:2-OH</b>     | 0.068 ± 0.016 <sup>d ee</sup>             | 0.055 ± 0.005                           | 0.049 ± 0.009                      | 0.034 ± 0.004                     | 0.026 ± 0.003               | 0.02 ± 0      |
| <b>C18:1-OH</b>     | 0.055 ± 0.017                             | 0.034 ± 0.003                           | 0.039 ± 0.002                      | 0.065 ± 0.007                     | 0.044 ± 0.004               | 0.034 ± 0.004 |
| <b>C18-OH</b>       | 0.034 ± 0.005                             | 0.039 ± 0.007                           | 0.039 ± 0.006                      | 0.064 ± 0.011 <sup>n</sup>        | 0.04 ± 0.006                | 0.026 ± 0.002 |



Supplemental Table 3. Developmental acylcarnitine profile in the rat hippocampus at PND 0, 7, 14, 21, 28, 50 ((N=5/group)).



| Acylcarnitines<br>(pmol/mg) | Midbrain                                 |                                          |                                     |                                  |                              |               |
|-----------------------------|------------------------------------------|------------------------------------------|-------------------------------------|----------------------------------|------------------------------|---------------|
|                             | P0                                       | P7                                       | P14                                 | P21                              | P28                          | P50           |
| <b>Total</b>                | 57.06 ± 1.21 <sup>b cccc d</sup>         | 87.87 ± 8.902 <sup>ggg</sup>             | 116.9 ± 7.971 <sup>l</sup>          | 165 ± 17.12 <sup>mmm nnnn</sup>  | 108.1 ± 7.45                 | 70.25 ± 4.029 |
| <b>C0</b>                   | 28.52 ± 3.316 <sup>b cccc</sup>          | 49.66 ± 6.723 <sup>ggg</sup>             | 78.51 ± 5.879 <sup>l</sup>          | 113.2 ± 16.41 <sup>m nnn</sup>   | 68.73 ± 6.645                | 37.38 ± 2.397 |
| <b>C2</b>                   | 20.35 ± 2.669                            | 26.74 ± 1.677 <sup>i</sup>               | 22.53 ± 1.996                       | 24.58 ± 3.751                    | 18.35 ± 1.467                | 15.39 ± 0.629 |
| <b>C3</b>                   | 0.344 ± 0.066 <sup>ccc</sup>             | 0.364 ± 0.043 <sup>ggg</sup>             | 0.648 ± 0.05                        | 1.055 ± 0.119 <sup>nn</sup>      | 0.766 ± 0.153                | 0.411 ± 0.013 |
| <b>C3-DC</b>                | 1.131 ± 0.405 <sup>bb c d ee</sup>       | 1.064 ± 0.178 <sup>ff g h ii</sup>       | 0.169 ± 0.019                       | 0.233 ± 0.029                    | 0.222 ± 0.049                | 0.126 ± 0.025 |
| <b>C4</b>                   | 1.571 ± 0.122 <sup>c</sup>               | 3.399 ± 0.812                            | 3.988 ± 0.434                       | 5.315 ± 1.311 <sup>nn</sup>      | 2.393 ± 0.216                | 1.151 ± 0.108 |
| <b>C4-OH</b>                | 0.028 ± 0.02 <sup>c</sup>                | 0.06 ± 0.058                             | 0.095 ± 0.077 <sup>kk ll</sup>      | 0.143 ± 0.078                    | 0.118 ± 0.03                 | 0.064 ± 0.032 |
| <b>C4-DC</b>                | 0.013 ± 0.003 <sup>bb cccc ddd</sup>     | 0.01 ± 0.006 <sup>ggg hh</sup>           | 0.022 ± 0.006 <sup>j</sup>          | 0.035 ± 0.01 <sup>nnn</sup>      | 0.02 ± 0.018 <sup>o</sup>    | 0.016 ± 0.006 |
| <b>C5:1</b>                 | 0.029 ± 0.002 <sup>b cccc</sup>          | 0.01 ± 0.002 <sup>fff gggg hh</sup>      | 0.022 ± 0.001 <sup>ljj</sup>        | 0.035 ± 0.001 <sup>mmm nnn</sup> | 0.02 ± 0.001                 | 0.016 ± 0.002 |
| <b>C5</b>                   | 0.477 ± 0.086 <sup>cccc</sup>            | 0.576 ± 0.088                            | 0.959 ± 0.069 <sup>ij l</sup>       | 1.574 ± 0.159 <sup>mmm nnn</sup> | 0.772 ± 0.09                 | 0.412 ± 0.052 |
| <b>C5-OH</b>                | 0.122 ± 0.009 <sup>b cccc dddd</sup>     | 0.155 ± 0.018 <sup>f gggg hhhh</sup>     | 0.38 ± 0.031 <sup>ljj kk</sup>      | 1.063 ± 0.069 <sup>mmm nnn</sup> | 0.641 ± 0.056 <sup>ooo</sup> | 0.294 ± 0.026 |
| <b>C5-DC/C10-OH</b>         | 0.028 ± 0 <sup>c</sup>                   | 0.047 ± 0.008                            | 0.051 ± 0.019                       | 0.099 ± 0.021 <sup>n</sup>       | 0.05 ± 0.007                 | 0.034 ± 0.009 |
| <b>C6</b>                   | 0.161 ± 0.004 <sup>b</sup>               | 0.258 ± 0.039 <sup>h i</sup>             | 0.342 ± 0.051 <sup>kkk ll</sup>     | 0.206 ± 0.04                     | 0.1 ± 0.008                  | 0.077 ± 0.006 |
| <b>C8:1</b>                 | 0.033 ± 0.007 <sup>bb</sup>              | 0.053 ± 0.003 <sup>gg hhh iii</sup>      | 0.064 ± 0.002 <sup>ljj kkk ll</sup> | 0.023 ± 0.008                    | 0.019 ± 0.003                | 0.015 ± 0.001 |
| <b>C8</b>                   | 0.06 ± 0.004 <sup>aa bb</sup>            | 0.201 ± 0.02 <sup>gg hh iii</sup>        | 0.187 ± 0.027 <sup>kk ll</sup>      | 0.085 ± 0.026                    | 0.065 ± 0.01                 | 0.044 ± 0.007 |
| <b>C10:1</b>                | 0.098 ± 0.031 <sup>c e</sup>             | 0.117 ± 0.013 <sup>gg hh ii</sup>        | 0.084 ± 0.003                       | 0.031 ± 0.009                    | 0.042 ± 0.007                | 0.03 ± 0.006  |
| <b>C10</b>                  | 0.038 ± 0.002 <sup>b</sup>               | 0.14 ± 0.012                             | 0.186 ± 0.028                       | 0.133 ± 0.048                    | 0.121 ± 0.023                | 0.08 ± 0.014  |
| <b>C12:1</b>                | 0.038 ± 0.005                            | 0.066 ± 0.008                            | 0.066 ± 0.006                       | 0.089 ± 0.019                    | 0.114 ± 0.023                | 0.132 ± 0.064 |
| <b>C12</b>                  | 0.112 ± 0.005 <sup>bb c</sup>            | 0.398 ± 0.047                            | 1.129 ± 0.148                       | 1.12 ± 0.11                      | 0.915 ± 0.061                | 0.879 ± 0.323 |
| <b>C12:1-OH</b>             | 0.016 ± 0.003                            | 0.014 ± 0.001                            | 0.03 ± 0.003                        | 0.037 ± 0.005                    | 0.023 ± 0.003                | 0.045 ± 0.022 |
| <b>C12-OH</b>               | 0.021 ± 0.002                            | 0.028 ± 0.005                            | 0.04 ± 0.007                        | 0.031 ± 0.005                    | 0.03 ± 0.005                 | 0.026 ± 0.008 |
| <b>C14:2</b>                | 0.04 ± 0.006                             | 0.034 ± 0.002                            | 0.063 ± 0.005                       | 0.055 ± 0.009                    | 0.06 ± 0.006                 | 0.103 ± 0.042 |
| <b>C14:1</b>                | 0.139 ± 0.006                            | 0.122 ± 0.012                            | 0.359 ± 0.023                       | 0.941 ± 0.176                    | 0.942 ± 0.18                 | 1.012 ± 0.387 |
| <b>C14</b>                  | 0.433 ± 0.026 <sup>c d</sup>             | 0.624 ± 0.054 <sup>g h</sup>             | 1.56 ± 0.051                        | 1.904 ± 0.458                    | 1.924 ± 0.21                 | 1.455 ± 0.363 |
| <b>C14:1-OH</b>             | 0.019 ± 0.003                            | 0.018 ± 0.002                            | 0.034 ± 0.005                       | 0.054 ± 0.006                    | 0.049 ± 0.006                | 0.05 ± 0.017  |
| <b>C14-OH</b>               | 0.534 ± 0.157                            | 0.689 ± 0.059                            | 0.334 ± 0.044                       | 0.115 ± 0.017                    | 0.054 ± 0.007                | 0.059 ± 0.015 |
| <b>C16:1</b>                | 0.28 ± 0.019 <sup>ccc dd ee</sup>        | 0.282 ± 0.022 <sup>ggg hh iii</sup>      | 0.66 ± 0.09 <sup>ij kk ll</sup>     | 2.569 ± 0.09                     | 2.332 ± 0.405                | 2.483 ± 0.511 |
| <b>C16</b>                  | 0.54 ± 0.053 <sup>ccc dd ee</sup>        | 0.662 ± 0.041 <sup>ggg hh iii</sup>      | 1.258 ± 0.085 <sup>ij k l</sup>     | 3.366 ± 0.604                    | 3.089 ± 0.328                | 3.044 ± 0.307 |
| <b>C16:1-OH</b>             | 0.328 ± 0.073 <sup>a bbb cc dd eee</sup> | 0.481 ± 0.015 <sup>fff ggg hhh iii</sup> | 0.049 ± 0.012                       | 0.135 ± 0.021                    | 0.112 ± 0.022                | 0.097 ± 0.01  |
| <b>C16-OH</b>               | 0.23 ± 0.021                             | 0.288 ± 0.033                            | 0.333 ± 0.058                       | 0.226 ± 0.05                     | 0.107 ± 0.017                | 0.406 ± 0.209 |
| <b>C18:2</b>                | 0.594 ± 0.072                            | 0.43 ± 0.04                              | 0.69 ± 0.133                        | 0.873 ± 0.089                    | 0.692 ± 0.12                 | 2.317 ± 1.049 |
| <b>C18:1</b>                | 0.299 ± 0.03 <sup>ccc ddd</sup>          | 0.285 ± 0.03 <sup>ggg hhh</sup>          | 0.934 ± 0.063 <sup>ij kk</sup>      | 4.023 ± 0.439                    | 4.017 ± 0.659                | 1.851 ± 0.736 |
| <b>C18</b>                  | 0.027 ± 0.01 <sup>ccc dd</sup>           | 0.025 ± 0.003 <sup>ggg hh</sup>          | 0.414 ± 0.065                       | 0.922 ± 0.179 <sup>nn</sup>      | 0.737 ± 0.063                | 0.288 ± 0.151 |
| <b>C18:2-OH</b>             | 0.027 ± 0.002                            | 0.021 ± 0.003                            | 0.041 ± 0.011                       | 0.043 ± 0.009                    | 0.034 ± 0.007                | 0.051 ± 0.014 |
| <b>C18:1-OH</b>             | 0.046 ± 0.005 <sup>c</sup>               | 0.026 ± 0.002 <sup>gg hh</sup>           | 0.043 ± 0.009 <sup>ij k</sup>       | 0.113 ± 0.013 <sup>n</sup>       | 0.104 ± 0.021                | 0.054 ± 0.01  |
| <b>C18-OH</b>               | 0.082 ± 0.01                             | 0.132 ± 0.017 <sup>f h</sup>             | 0.05 ± 0.007                        | 0.098 ± 0.013                    | 0.057 ± 0.009                | 0.081 ± 0.025 |

Supplemental Table 4. Developmental acylcarnitine profile in the rat midbrain at PND 0, 7, 14, 21, 28, 50 ((N=5/group)).

| Acylcarnitines<br>(pmol/mg) | Cerebellum                            |                                          |                                     |                                  |                            |               |
|-----------------------------|---------------------------------------|------------------------------------------|-------------------------------------|----------------------------------|----------------------------|---------------|
|                             | P0                                    | P7                                       | P14                                 | P21                              | P28                        | P50           |
| <b>Total</b>                | 77.67 ± 18.19 <sup>aaa bb</sup>       | 177.7 ± 7.597 <sup>gg hhh iii</sup>      | 143.6 ± 11.92 <sup>k lll</sup>      | 105.9 ± 5.67                     | 86.26 ± 3.833              | 67.56 ± 5.009 |
| <b>C0</b>                   | 21.93 ± 5.736 <sup>aaa bbb cc d</sup> | 97.28 ± 6.814 <sup>g hh iii</sup>        | 89.29 ± 9.24 <sup>kk lll</sup>      | 64.8 ± 6                         | 52.67 ± 4.261              | 40.04 ± 2.98  |
| <b>C2</b>                   | 48.84 ± 10.86 <sup>c dd ee</sup>      | 66.35 ± 2.166 <sup>f ggg hhhh iii</sup>  | 39.28 ± 3.12 <sup>l</sup>           | 24.81 ± 0.747                    | 20.82 ± 0.83               | 16.06 ± 1.395 |
| <b>C3</b>                   | 0.448 ± 0.123 <sup>aaa bbbb</sup>     | 1.109 ± 0.121 <sup>hh iii</sup>          | 1.216 ± 0.07 <sup>kkk llll</sup>    | 0.757 ± 0.054                    | 0.543 ± 0.039              | 0.435 ± 0.069 |
| <b>C3-DC</b>                | 0.096 ± 0.038 <sup>aa bbbb</sup>      | 0.237 ± 0.022                            | 0.342 ± 0.027 <sup>jj kk llll</sup> | 0.197 ± 0.012                    | 0.168 ± 0.014              | 0.123 ± 0.024 |
| <b>C4</b>                   | 1.675 ± 0.497 <sup>aa bb</sup>        | 5.175 ± 0.702 <sup>hhh iii</sup>         | 4.616 ± 0.288 <sup>kk lll</sup>     | 3.602 ± 0.749 <sup>n</sup>       | 1.639 ± 0.125              | 1.057 ± 0.066 |
| <b>C4-OH</b>                | 0.285 ± 0.076 <sup>aaa bb</sup>       | 0.738 ± 0.065 <sup>ggg hhh iii</sup>     | 0.629 ± 0.073 <sup>jj kkk ll</sup>  | 0.263 ± 0.026                    | 0.161 ± 0.018              | 0.256 ± 0.023 |
| <b>C4-DC</b>                | 0.058 ± 0.012 <sup>aaaa b c</sup>     | 0.193 ± 0.018 <sup>f g hhh iii</sup>     | 0.128 ± 0.014                       | 0.12 ± 0.015                     | 0.086 ± 0.007              | 0.08 ± 0.005  |
| <b>C5:1</b>                 | 0 ± 0 <sup>aaa bbbb ccc d</sup>       | 0.02 ± 0.002                             | 0.023 ± 0.003 <sup>k l</sup>        | 0.019 ± 0.002                    | 0.011 ± 0.002              | 0.01 ± 0.004  |
| <b>C5</b>                   | 0.753 ± 0.132                         | 0.525 ± 0.16 <sup>g</sup>                | 0.434 ± 0.013 <sup>jj</sup>         | 1.125 ± 0.074 <sup>n</sup>       | 0.729 ± 0.167              | 0.48 ± 0.047  |
| <b>C5-OH</b>                | 0.116 ± 0.032 <sup>cccc ddd</sup>     | 0.258 ± 0.031 <sup>gggg h</sup>          | 0.339 ± 0.047 <sup>jjj</sup>        | 0.746 ± 0.097 <sup>n n n n</sup> | 0.514 ± 0.034 <sup>o</sup> | 0.253 ± 0.028 |
| <b>C5-DC/C10-OH</b>         | 0.031 ± 0.012                         | 0.033 ± 0.003                            | 0.055 ± 0.008                       | 0.06 ± 0.014                     | 0.035 ± 0.006              | 0.054 ± 0.017 |
| <b>C6</b>                   | 0.181 ± 0.028                         | 0.193 ± 0.044                            | 0.11 ± 0.017                        | 0.137 ± 0.037                    | 0.083 ± 0.018              | 0.065 ± 0.009 |
| <b>C8:1</b>                 | 0.064 ± 0.019 <sup>a c dd ee</sup>    | 0.113 ± 0.003 <sup>ff ggg hhh iii</sup>  | 0.058 ± 0.007 <sup>j k ll</sup>     | 0.016 ± 0.002                    | 0.012 ± 0.002              | 0.007 ± 0.001 |
| <b>C8</b>                   | 0.058 ± 0.012 <sup>aaa</sup>          | 0.272 ± 0.05 <sup>ff gggg hhhh iii</sup> | 0.116 ± 0.016                       | 0.095 ± 0.015                    | 0.049 ± 0.013              | 0.028 ± 0.004 |
| <b>C10:1</b>                | 0.129 ± 0.025 <sup>ccc ddd eeee</sup> | 0.155 ± 0.01 <sup>f gggg hhhh iii</sup>  | 0.09 ± 0.009 <sup>k ll</sup>        | 0.037 ± 0.003                    | 0.025 ± 0.007              | 0.013 ± 0.002 |
| <b>C10</b>                  | 0.031 ± 0.012 <sup>aa b c</sup>       | 0.138 ± 0.004 <sup>l</sup>               | 0.122 ± 0.019                       | 0.13 ± 0.017                     | 0.084 ± 0.031              | 0.049 ± 0.006 |
| <b>C12:1</b>                | 0.04 ± 0.005                          | 0.072 ± 0.005                            | 0.053 ± 0.003                       | 0.046 ± 0.006                    | 0.063 ± 0.016              | 0.05 ± 0.011  |
| <b>C12</b>                  | 0.076 ± 0.027 <sup>bbb cc</sup>       | 0.343 ± 0.03 <sup>f</sup>                | 0.75 ± 0.093                        | 0.543 ± 0.127                    | 0.418 ± 0.065              | 0.415 ± 0.067 |
| <b>C12:1-OH</b>             | 0.048 ± 0.03                          | 0.006 ± 0.002                            | 0.01 ± 0.002                        | 0.009 ± 0.003                    | 0.011 ± 0.003              | 0.021 ± 0.006 |
| <b>C12-OH</b>               | 0.024 ± 0.014                         | 0.024 ± 0.003                            | 0.029 ± 0.003                       | 0.015 ± 0.005                    | 0.013 ± 0.002              | 0.019 ± 0.005 |
| <b>C14:2</b>                | 0.024 ± 0.014                         | 0.037 ± 0.004                            | 0.045 ± 0.003                       | 0.04 ± 0.005                     | 0.054 ± 0.007              | 0.051 ± 0.012 |
| <b>C14:1</b>                | 0.058 ± 0.012 <sup>c d ee</sup>       | 0.155 ± 0.017                            | 0.282 ± 0.044                       | 0.359 ± 0.076                    | 0.376 ± 0.086              | 0.406 ± 0.063 |
| <b>C14</b>                  | 0.15 ± 0.042 <sup>bbb ccc ddd e</sup> | 0.564 ± 0.037 <sup>f</sup>               | 1.267 ± 0.14                        | 1.149 ± 0.213                    | 1.141 ± 0.168              | 0.823 ± 0.092 |
| <b>C14:1-OH</b>             | 0 ± 0 <sup>a b ccc ddd eeee</sup>     | 0.02 ± 0.002                             | 0.022 ± 0.004                       | 0.029 ± 0.005                    | 0.033 ± 0.004              | 0.036 ± 0.005 |
| <b>C14-OH</b>               | 0.851 ± 0.231 <sup>ccc ddd eee</sup>  | 0.587 ± 0.065 <sup>g h i</sup>           | 0.459 ± 0.034                       | 0.059 ± 0.013                    | 0.033 ± 0.001              | 0.073 ± 0.02  |
| <b>C16:1</b>                | 0.135 ± 0.035 <sup>cc d eee</sup>     | 0.293 ± 0.01 <sup>g ii</sup>             | 0.467 ± 0.042                       | 0.919 ± 0.111                    | 0.812 ± 0.153              | 1.04 ± 0.223  |
| <b>C16</b>                  | 0.393 ± 0.101 <sup>cc dd ee</sup>     | 0.92 ± 0.035                             | 1.139 ± 0.074                       | 2.151 ± 0.157                    | 2.049 ± 0.265              | 2.006 ± 0.566 |
| <b>C16:1-OH</b>             | 0.031 ± 0.012                         | 0.039 ± 0.007                            | 0.031 ± 0.003                       | 0.056 ± 0.01                     | 0.046 ± 0.004              | 0.07 ± 0.012  |
| <b>C16-OH</b>               | 0.415 ± 0.1 <sup>cc ddd ee</sup>      | 0.487 ± 0.027 <sup>ggg hhhh iii</sup>    | 0.348 ± 0.014 <sup>j kkl</sup>      | 0.087 ± 0.01                     | 0.058 ± 0.003              | 0.113 ± 0.039 |
| <b>C18:2</b>                | 0.108 ± 0.039 <sup>ccc dd ee</sup>    | 0.299 ± 0.002 <sup>g</sup>               | 0.356 ± 0.029                       | 0.669 ± 0.071                    | 0.567 ± 0.048              | 0.585 ± 0.147 |
| <b>C18:1</b>                | 0.295 ± 0.097 <sup>cc dd ee</sup>     | 0.513 ± 0.038 <sup>g hh ii</sup>         | 0.83 ± 0.028 <sup>k l</sup>         | 2.117 ± 0.195                    | 2.288 ± 0.28               | 2.335 ± 0.625 |
| <b>C18</b>                  | 0.242 ± 0.073 <sup>b cc dd</sup>      | 0.443 ± 0.017                            | 0.564 ± 0.022                       | 0.623 ± 0.059                    | 0.576 ± 0.059              | 0.406 ± 0.08  |
| <b>C18:2-OH</b>             | 0.04 ± 0.005 <sup>d</sup>             | 0.039 ± 0.007                            | 0.033 ± 0.003                       | 0.02 ± 0.002                     | 0.015 ± 0.003              | 0.033 ± 0.007 |
| <b>C18:1-OH</b>             | 0.031 ± 0.012                         | 0.038 ± 0.006                            | 0.031 ± 0.003                       | 0.035 ± 0.006                    | 0.039 ± 0.005              | 0.044 ± 0.008 |
| <b>C18-OH</b>               | 0.012 ± 0.012                         | 0.038 ± 0.006                            | 0.041 ± 0.003                       | 0.03 ± 0.004                     | 0.029 ± 0.005              | 0.023 ± 0.007 |

Supplemental Table 5. Developmental acylcarnitine profile in the rat cerebellum at PND 0, 7, 14, 21, 28, 50 (N=5/group).

**Developmental regulation and localization of Carnitine Palmitoyltransferases  
(CPTs) in rat brain**

Jennifer N. Jernberg<sup>1</sup>, Caitlyn E. Bowman<sup>2</sup>, Michael J. Wolfgang<sup>2</sup>, Susanna Scafidi<sup>1</sup>

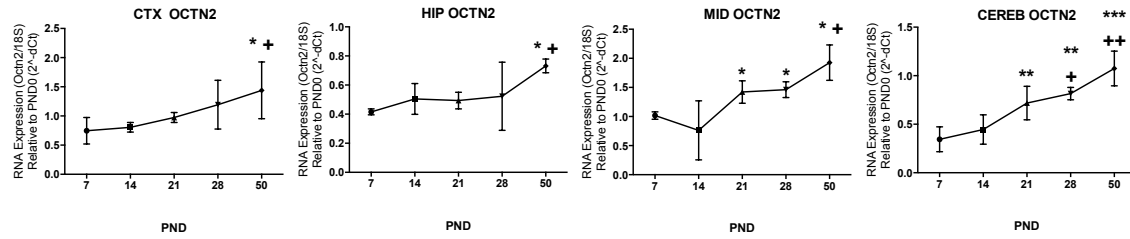

**Supplemental Figure 1. Developmental RNA expression of carnitine transporter in rat brain.** OCTN2 RNA expression was significantly greater at PND 50 relative to PND7 and PND 14 in the cortex, hippocampus and midbrain. RNA expression of OCTN2 increases with age such that PND7 OCTN2 expression is significantly less than PND 21, 28, and 50 in the cerebellum (n=5 per group \* =p<0.05, \*\* =p<0.01 relative to PND7, + =p<0.05, ++ =p<.01 relative to PND14).

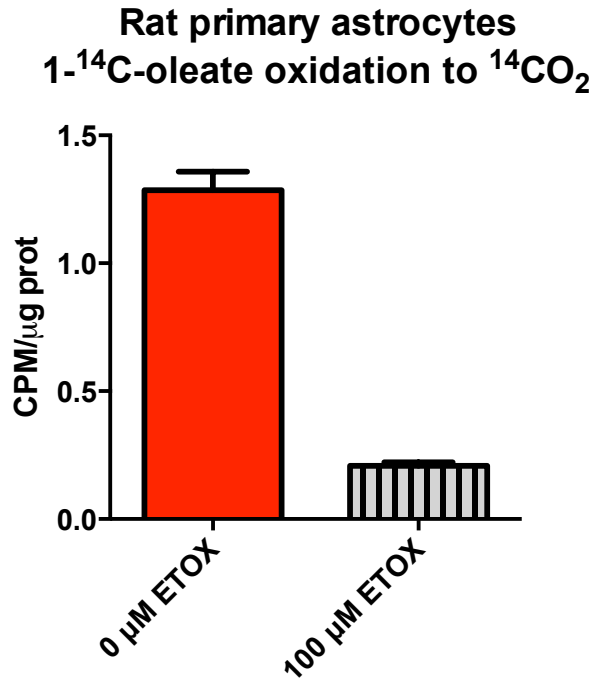

***Supplemental Figure 2. CPT1a-dependent fatty acid oxidation in cultured rat***

***astrocytes.*** Oxidation of  $[1\text{-}^{14}\text{C}]$  oleate to  $^{14}\text{CO}_2$  in cultured rat astrocytes was measured in the presence or absence of CPT1a inhibitor etomoxir (100 μM, ETOX). Assay was conducted in the presence of 0.12 μCi  $[1\text{-}^{14}\text{C}]$  oleate in modified Neurobasal medium containing 5mM glucose, 25 μM glutamine, 50 μM pyruvate, and 0.2% (w/v) bovine serum albumin (BSA). **N=5 per group.**
